# Supplementary material
Source: PubMed Central journal article supplement (PMC7501216)
Supplement: NIHMS1605975-supplement-Supp_FigS2.pdf [file NIHMS1605975-supplement-Supp_FigS2.pdf]

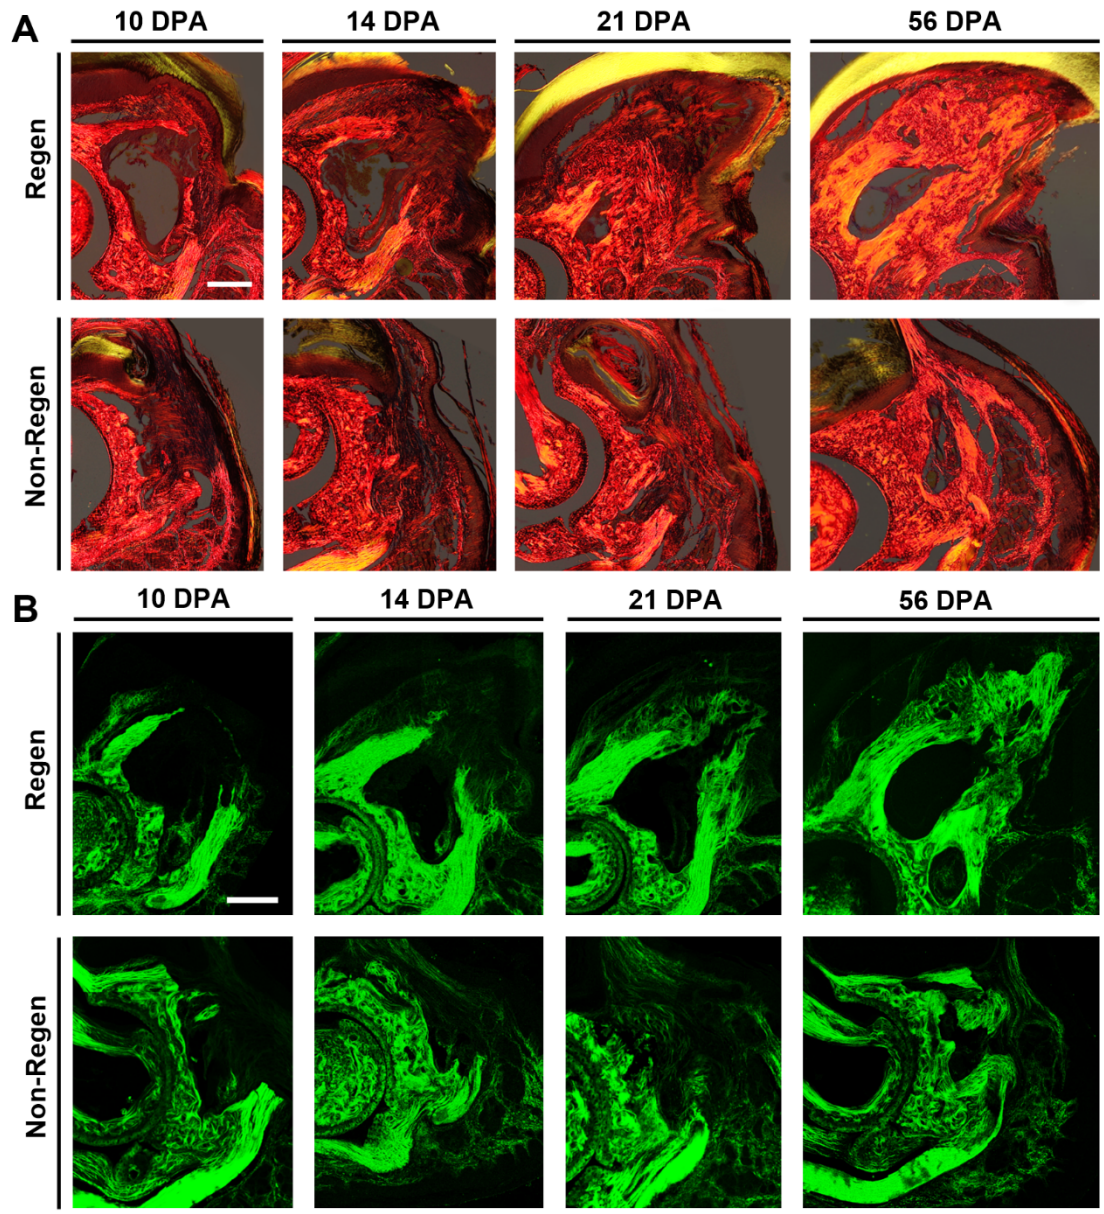

**Fig. S2. Time course of bone and fibrous tissue regeneration.** (A) Picosirius Red (PSR) staining visualized with polarized light microscopy and (B) second harmonic generation (SHG) imaging at various DPA show collagen fibers aligned proximodistally and dorsoventrally in Regen and Non-Regen digits, respectively. Bone regrowth occurs only in the Regen group. Scale: 0.2 mm.
