# Supplementary material
Source: PubMed Central journal article supplement (PMC7501216)
Supplement: NIHMS1605975-supplement-Supp_FigS6.pdf [file NIHMS1605975-supplement-Supp_FigS6.pdf]

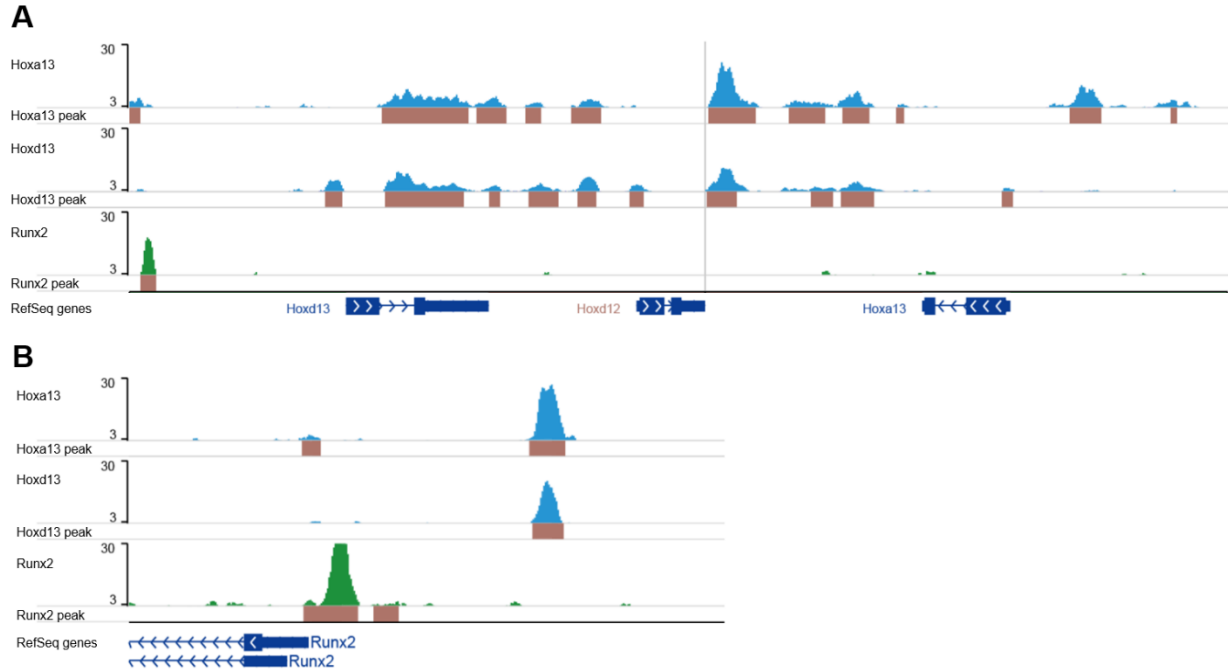

**Fig. S6. Interactions between *Hoxa13/Hoxd13* (Hox13) and *Runx2*.** (A) Hox13 (blue) and *Runx2* (green) ChIP-seq peaks at the Hox13 and (B) *Runx2* genes. Peaks indicate a *Runx2* binding site upstream of the *Hoxd13* but not *Hoxa13* promoter, and Hox13 binding sites upstream of the *Runx2* transcription start site.
