# Supplementary material
Source: PubMed Central journal article supplement (PMC7501216)
Supplement: NIHMS1605975-supplement-Supp_FigS7.pdf [file NIHMS1605975-supplement-Supp_FigS7.pdf]

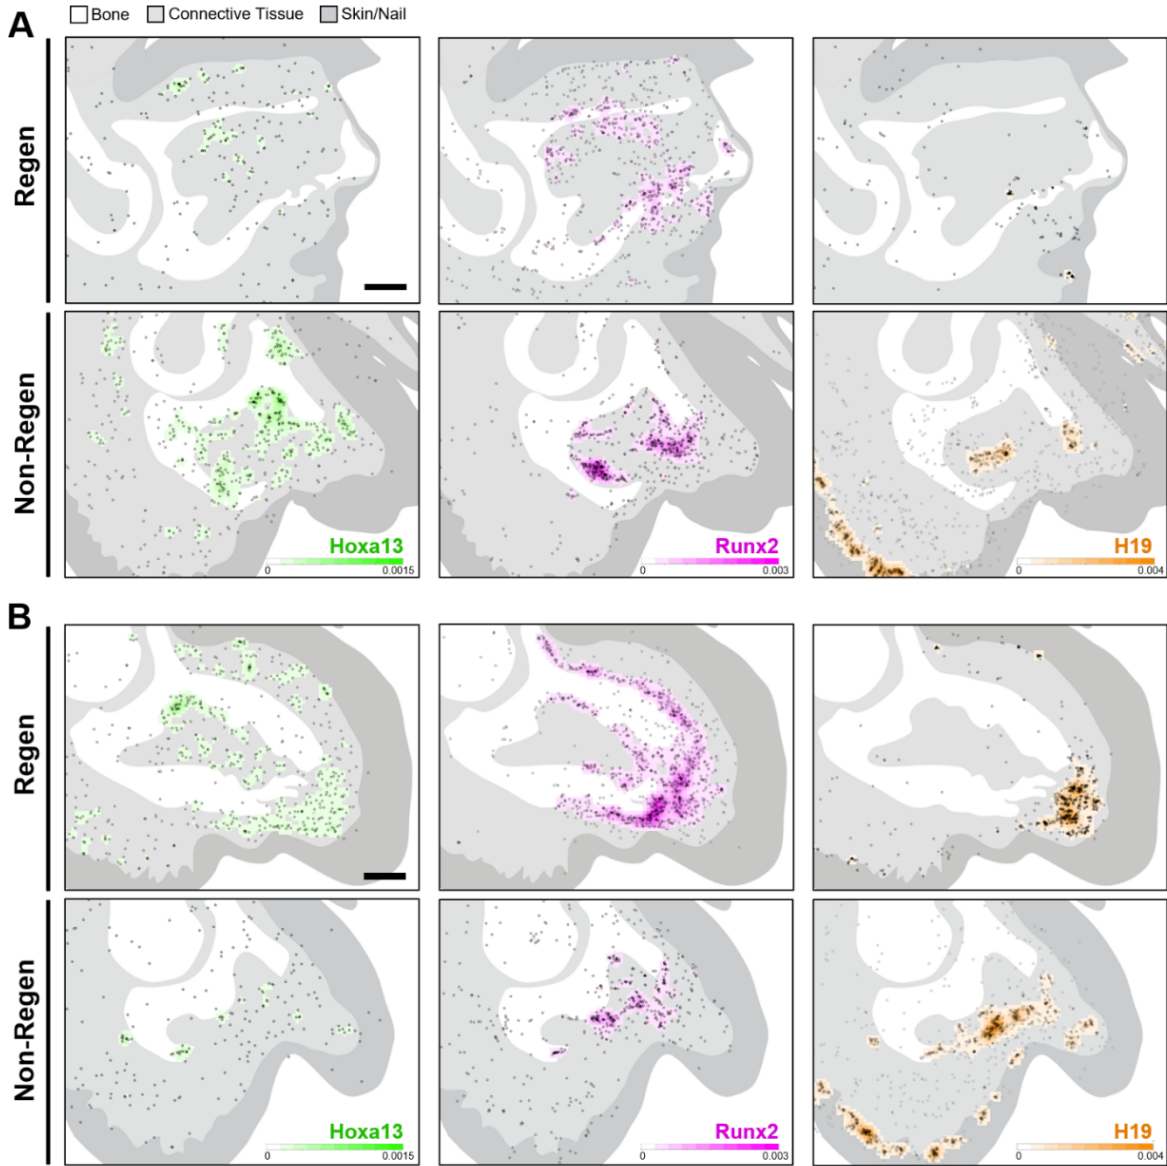

**Fig. S7. RNA FISH reveals spatiotemporal gene expression during digit regeneration.** (A) Density heat maps show estimated RNA FISH probes per unit area for *Hoxa13* (green), *Runx2* (magenta), and *H19* (orange) in Regen and Non-Regen digits at 12 DPA and (B) 21 DPA. Circles represent individual probe signals. Scale: 0.2 mm.
